# Supplementary material for: Serum-Based Lipid Panels for Diagnosis of Idiopathic Parkinson’s Disease
Source: Metabolites. 2023 Sep 2;13(9):990. doi: 10.3390/metabo13090990 (PMC10537766; doi:10.3390/metabo13090990)
Supplement: Supplementary file 1 [file metabolites-13-00990-s001.zip › Supplementary Figures_Figure S1 and S2.pdf]

### List of Supplementary Figures

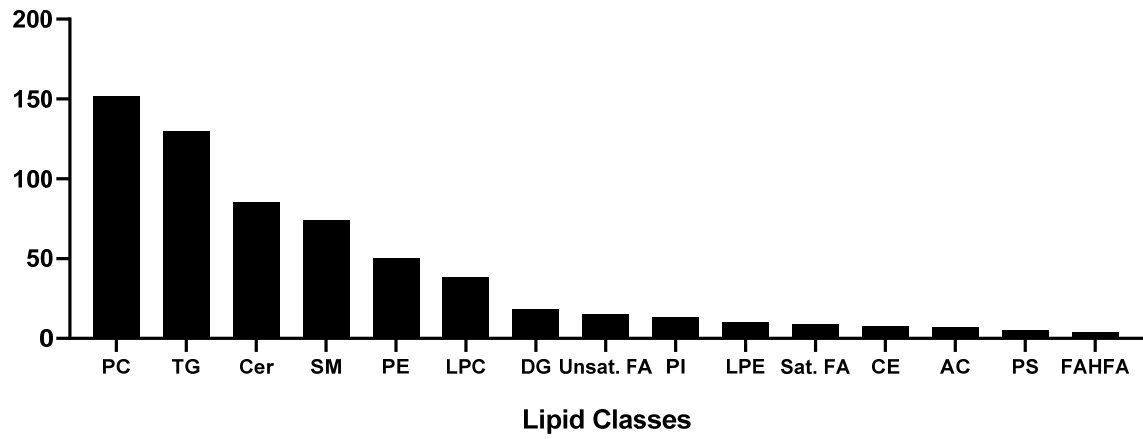

**Figure S1.** Main Lipid Classes identified in the study

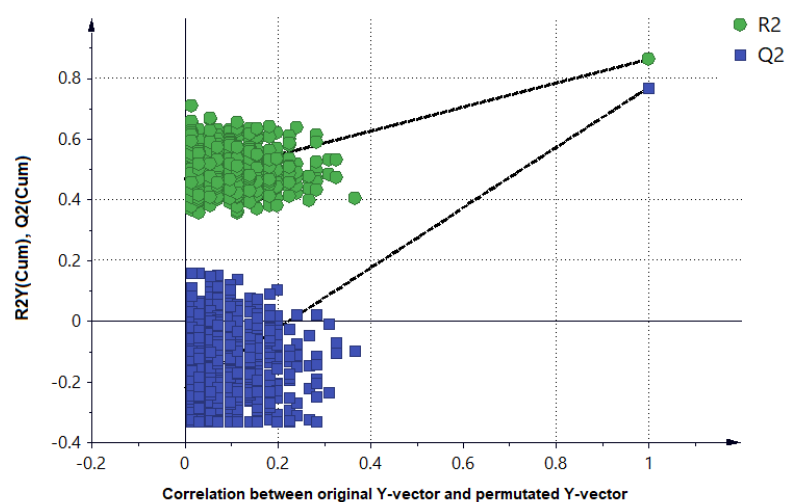

**Figure S2.** Permutation tests for the validation of the PLS-DA model generated from the comparison of serum lipidome of PD to health control cases. A permutation test was performed with 999 random permutations.  $R^2Y$  (blue squares) and  $Q^2$  (green circles) values from the permuted analysis (bottom left) are significantly lower than the corresponding original values (top right).
