# Supplementary material for: Serum-Based Lipid Panels for Diagnosis of Idiopathic Parkinson’s Disease
Source: Metabolites. 2023 Sep 2;13(9):990. doi: 10.3390/metabo13090990 (PMC10537766; doi:10.3390/metabo13090990)
Supplement: Supplementary file 1 [file metabolites-13-00990-s001.zip › Supplementary Information_Table S1 and Table S2.xlsx]

## Sheet: Table S1
Table S1. Summary for significantly altered lipids (in multivariate and univariate analyses) in Parkinson's disease patients compared to healthy controls.
No.		P-value	FDR	VIP	Fold Change
1	PS 40:4	3.1183e-19	1.2585e-16	5.751	0.080605
2	MGDG 36:4	3.2147e-19	1.2585e-16	3.8995	0.3437
3	PS 16:0_22:4	8.2383e-19	2.1502e-16	5.6284	0.084207
4	PS 17:0-18:1-d5	4.1756e-16	8.1737e-14	3.9993	2.7237
5	PE O-40:8|PE O-22:6_18:2	1.1931e-12	1.8684e-10	3.682	2.3708
6	Cer d40:0	1.4273e-11	1.8626e-09	2.7064	0.55738
7	PC 37:7	2.6599e-11	2.9752e-09	3.6964	2.5584
8	PS 18:0_22:3	8.9873e-11	8.7963e-09	5.0622	0.12909
9	Cer 18:1;2O_22:0;(2OH)	2.3636e-10	2.045e-08	2.8693	0.52921
10	Cer-NP t40:0	2.6117e-10	2.045e-08	2.128	0.67965
11	PE 36:3;O|PE 18:2_18:1;O	5.0682e-10	3.6076e-08	3.2306	2.1004
12	Cer-NP t42:1	7.3722e-10	4.8103e-08	1.9307	0.71484
13	Cer-AS d34:1	6.3561e-09	3.8283e-07	2.647	0.48844
14	Cer 18:0;2O_20:0	4.1601e-08	2.3267e-06	2.0513	0.67731
15	Cer 18:1;2O/16:0;(2OH)	4.6836e-08	2.4448e-06	2.4461	0.52895
16	pyroGlu-Val	1.0255e-07	5.0183e-06	3.1371	0.33713
17	Cer-NDS d41:0	1.3063e-07	6.0167e-06	2.1553	0.64231
18	15-hydroperoxy-5Z,8Z,11Z,13E-eicosatetraenoic acid	2.1567e-07	9.3817e-06	2.6575	2.102
19	Cer 18:1;2O/23:0;(2OH)	2.9248e-07	1.2053e-05	2.2584	0.64683
20	Cer 41:0;2O	3.7573e-07	1.4268e-05	1.9126	0.69002
21	SM 41:1;2O|SM 18:1;2O/23:0	3.8266e-07	1.4268e-05	1.7767	0.71439
22	Cer 18:1;2O/24:1;(2OH)	5.1215e-07	1.8228e-05	2.3605	0.60785
23	TG O-56:9|TG O-22:5_16:2_18:2	5.8089e-07	1.9776e-05	3.6108	3.6219
24	FA 23:0	1.067e-06	3.4002e-05	1.8463	0.66534
25	MGDG 34:2	1.0856e-06	3.4002e-05	1.4247	0.80843
26	Cer 16:0;2O_23:0	1.65e-06	4.8082e-05	2.136	0.63718
27	Cer 18:1;2O/20:0;(2OH)	1.658e-06	4.8082e-05	2.1823	0.60593
28	cholesterol 3-sulfate	3.7501e-06	0.00010437	1.5639	0.77749
29	PC 32:1	3.8655e-06	0.00010437	1.3225	1.2087
30	glutamic acid	4.0017e-06	0.00010444	2.5732	0.46176
31	TG 52:3;2O|TG 16:0_18:1_18:2;2O	4.9308e-06	0.00012454	3.6107	3.5437
32	PMeOH 36:4	5.7043e-06	0.00013958	2.9297	2.773
33	DG 16:0_16:0	8.4734e-06	0.00020105	1.7841	0.68252
34	PE-Cer 18:0;2O_22:1	9.4047e-06	0.00021658	1.8921	0.65954
35	LPC 15:0	9.8673e-06	0.00022075	1.7584	1.3985
36	Cer 18:0;2O/24:0	1.0964e-05	0.00023847	1.9185	0.6324
37	LPC 17:0	1.2031e-05	0.00025459	1.7424	1.3846
38	LPC 22:5	2.2316e-05	0.00045983	1.6753	1.3641
39	16(17)-epoxy-4Z,7Z,10Z,13Z,19Z-docosapentaenoic acid	2.8019e-05	0.00056254	2.4874	0.35567
40	LPC 16:0	4.2893e-05	0.00083963	1.2247	1.1844
41	PC 18:2_20:4	4.4903e-05	0.00084685	1.6783	1.3723
42	SM d42:1	4.5425e-05	0.00084685	1.9586	0.57103
43	8,15-DiHETE	4.8634e-05	0.0008752	2.1005	1.5258
44	Cer 41:2;2O|Cer 18:2;2O/23:0	4.9181e-05	0.0008752	1.5601	0.75287
45	PE-Cer 20:1;2O/22:0	5.0372e-05	0.00087647	1.4643	0.76988
46	LPC 22:4	5.2902e-05	0.00088836	1.5645	1.3426
47	Phenol sulfate	5.3324e-05	0.00088836	3.1035	0.31301
48	Cer-NDS d36:0	7.7472e-05	0.0012638	1.622	0.70473
49	FA 21:0	8.2752e-05	0.0013223	1.6261	0.6853
50	LPC 19:0	0.00016161	0.0025308	1.5868	1.349
51	dodemorph	0.00019233	0.0029529	1.7534	0.63364
52	PC O-42:4	0.0001989	0.002995	1.4512	0.73346
53	LPC 16:0.1	0.00024674	0.0036453	1.2407	1.1949
54	Cer 43:2;2O|Cer 19:1;2O/24:1	0.00025429	0.0036871	1.3933	1.2893
55	PC O-34:4|PC O-16:2_18:2	0.00027375	0.0038855	2.4166	0.40282
56	PE 36:0|PE 18:0_18:0	0.00027789	0.0038855	1.8337	1.5049
57	TG 51:3	0.0002992	0.0041101	1.4606	1.2856
58	dehydroepiandrosterone sulfate	0.00030964	0.0041801	2.263	0.64707
59	SM 36:4;3O	0.00035243	0.0046772	1.6196	0.66139
60	SM 42:0;2O	0.0003662	0.0047789	1.6744	0.61179
61	LPC 17:1-SN1	0.00040545	0.0052044	1.4464	1.2741
62	LPC 18:1	0.0004265	0.0053863	1.2631	1.2141
63	Cer 42:0;2O|Cer 18:0;2O/24:0	0.00050581	0.0062865	1.4902	0.70355
64	Cer d34:0	0.00059	0.007158	1.1584	0.83444
65	PC O-30:0 or PC 30:0e	0.00059421	0.007158	1.6039	1.3857
66	SM d34:2	0.00060349	0.0071594	1.1814	0.81207
67	TG 12:0_12:0_18:3	0.00061262	0.0071594	2.1221	1.9512
68	12-HETE	0.00082782	0.0095321	2.4189	1.679
69	TG 48:4 Isomer A	0.0008643	0.0098079	1.9078	1.8841
70	SM d41:2 Isomer B	0.00087882	0.0098303	1.18	0.80511
71	gluconic acid	0.0010212	0.01113	2.2035	0.59987
72	PC O-34:3	0.0010234	0.01113	1.1387	0.82887
73	TG 53:4	0.0010687	0.011463	1.3913	1.3252
74	LPC 22:5.1	0.0010932	0.011567	1.4623	1.3969
75	Cer-NS d39:1	0.0011492	0.011997	1.1623	0.82402
76	4-Hydroxy-5E,7Z,10Z,13Z,16Z,19Z-docosahexaenoic acid	0.001332	0.013723	2.0377	1.6408
77	LPE-N (FA)34:0|LPE-N (FA 16:0)18:0	0.0015015	0.015196	1.6136	1.448
78	PE P-38:5 or PE O-38:6	0.0015157	0.015196	1.6778	0.60885
79	LPC 16:1	0.0015331	0.015196	1.1563	1.2228
80	LPC 20:1	0.0016189	0.015612	1.2856	1.2755
81	LPC 14:0	0.0016499	0.015612	1.3663	1.3253
82	MAG	0.0016549	0.015612	2.0802	0.36146
83	LPC 20:4	0.0018535	0.017074	1.1947	1.2316
84	SM d36:0	0.0024831	0.022129	1.3384	0.73588
85	PC 36:6e	0.002487	0.022129	1.8634	0.59884
86	TG 51:4	0.0025603	0.022525	1.3358	1.2907
87	Ricinoleic acid	0.0026988	0.0231	1.3362	0.7049
88	Cer-NDS d34:0	0.0027142	0.0231	1.0412	0.82143
89	Benzenesulfonic acid	0.0028031	0.023601	1.5983	0.66432
90	PC O-18:2_20:4	0.0032618	0.027143	1.2962	0.81531
91	SM 40:1;2O|SM 18:1;2O/22:0	0.0033036	0.027143	1.2597	0.84722
92	LPC O-18:1	0.0033278	0.027143	1.2218	1.2311
93	TG 50:4|TG 16:1_16:1_18:2	0.003364	0.027155	1.1943	1.26
94	Cer 18:2;2O/24:1	0.0035103	0.028047	1.081	1.2257
95	SM 20:0;2O/21:1	0.0035812	0.028324	1.4234	0.88573
96	PE O-20:0_20:4	0.0036187	0.028334	1.0096	1.1646
97	LPC O-22:1	0.0037939	0.029412	1.2645	1.3207
98	TG 46:4 Isomer A	0.004004	0.030736	1.7611	1.724
99	LPC O-16:0	0.0041532	0.031573	1.078	1.21
100	TG 46:3 Isomer A	0.004208	0.031681	1.7466	1.6074
101	PC O-37:0	0.0043567	0.032489	1.2572	0.78883
102	Cer 18:1;2O/24:1	0.0044058	0.032545	1.2299	0.75885
103	TG 14:0_16:0_18:4	0.004876	0.035682	1.8701	2.1446
104	PE P-36:4 or PE O-36:5	0.0050211	0.036403	1.5176	0.60143
105	PE O-18:1_20:4	0.0051274	0.036498	1.519	0.63204
106	LPC 18:1.1	0.0051275	0.036498	1.1458	1.2008
107	TG 48:3|TG 12:0_18:1_18:2	0.0054497	0.03828	1.5428	1.5621
108	isoleucine	0.0055006	0.03828	1.2285	0.72538
109	LPC 18:2	0.0055244	0.03828	1.0246	1.1778
110	TG 46:2	0.0056534	0.03883	1.5759	1.5122
111	SM 40:0;3O	0.0060111	0.040928	1.4755	0.69378
112	PC O-16:1_18:2	0.0060794	0.041036	1.0384	0.83969
113	TG 18:1_18:1_19:1	0.0061588	0.041217	1.0442	1.2009
114	FA 16:1	0.0063265	0.041627	1.5585	0.6815
115	LPC 22:6	0.0065944	0.043029	1.1495	1.2248
116	LPC 44:5	0.0067582	0.043733	1.2022	0.79268
117	2,5-dihydroxybenzenesulfonate	0.0068579	0.044014	1.9504	0.40489
118	LPC 20:2	0.0071303	0.045024	1.0741	1.196
119	PC 38:5 Isomer A	0.008155	0.049415	1.2476	1.2145
120	LPC 20:0	0.0081976	0.049415	1.0435	1.1874
121	Behenic acid	0.0082811	0.049415	1.1284	0.74537
122	LPC 20:1.1	0.0083248	0.049415	1.1189	1.2339
123	PC P-36:4 or PC O-36:5	0.0084326	0.049645	1.1261	0.83626
124	LPC 16:1.1	0.0090885	0.052338	1.01	1.1935
125	PC O-42:3 or PC 42:3e	0.009196	0.052338	1.0648	0.82106
126	LPC 42:4	0.0092244	0.052338	1.2827	0.71997
127	TG 54:3|TG 18:1_18:1_18:1	0.009877	0.055023	1.2707	1.2473
128	Cer-NS d38:2	0.0099084	0.055023	1.015	1.2008
129	PE O-18:1_18:1	0.010576	0.05791	1.3401	0.71133
130	DG 36:4 Isomer A	0.010685	0.058098	1.257	1.2901
131	LPC 19:0-SN1	0.012824	0.069248	1.0107	1.1892
132	GM3 d34:1	0.013448	0.07163	1.1487	0.78026
133	Cer 40:0;2O|Cer 18:0;2O/22:0	0.013772	0.071895	1.0381	0.80888
134	stearidonic acid (FA 18:4)	0.014122	0.071895	1.6647	2.0889
135	PC 31:0	0.014736	0.073493	1.2425	0.64367
136	Phosphatidylethanolamine alkenyl 16:0-20:4	0.016097	0.078996	1.3198	0.61685
137	FAHFA 38:4	0.016114	0.078996	1.2767	0.76815
138	HexCer 42:2;3O	0.016635	0.079907	1.1076	0.82429
139	13-KODE	0.016996	0.081146	1.1953	1.4495
140	TG 42:3	0.018416	0.087391	1.4671	1.4848
141	5-alpha-androstan-3-beta-ol-17-one sulfate	0.020491	0.095471	1.4548	0.68513
142	Taurine	0.022113	0.10067	1.07	0.74884
143	TG 49:3	0.023478	0.10575	1.2211	1.1901
144	TG 44:1	0.023514	0.10575	1.4613	1.6587
145	LPE-N (FA)40:6|LPE-N (FA 18:0)22:6	0.023661	0.10575	1.152	1.3487
146	2-OAHSA	0.023769	0.10575	1.2955	0.72908
147	TG 14:0_16:0_17:1	0.023994	0.10614	1.3811	1.4754
148	acylcarnitine 18:0	0.024372	0.10674	1.0902	0.82983
149	PC 33:0	0.026351	0.11268	1.1769	1.1083
150	Acetyl-sulfamethoxazole	0.027277	0.11513	1.2913	4.688
151	PC O-46:5 or PC 46:5e	0.027825	0.11589	1.0968	1.4329
152	PE O-18:1_18:2	0.029954	0.12279	1.1269	0.72964
153	TG 44:2	0.030619	0.12422	1.5442	1.9016
154	PE O-16:1_22:6	0.033902	0.13339	1.3678	0.65458
155	TG 50:4|TG 14:0_18:2_18:2	0.034751	0.13605	1.3329	1.176
156	TG 47:3	0.035001	0.13618	1.3693	1.3102
157	PC 16:0/9:0 CHO	0.037071	0.14159	1.0205	1.3703
158	DG 36:3	0.037352	0.14197	1.0036	1.1822
159	FA 18:3 (y-linolenic acid)	0.037686	0.14255	1.1074	0.75393
160	CAR 14:2	0.038736	0.14582	1.25	0.59975
161	TG 46:1	0.040088	0.14806	1.2399	1.3977
162	TG 53:1	0.043692	0.15912	1.0806	1.1799
163	DG 18:2_18:2	0.04421	0.16026	1.0614	1.2801
164	TG 10:0_18:2_18:2	0.04477	0.16079	1.4355	1.5891
165	(1R,4aR)-6-hydroxy-1,4a-dimethyl-7-propan-2-yl-2,3,4,4b,5,6,10,10a-octahydrophenanthrene-1-carboxylic acid	0.045789	0.16297	1.2469	0.33726
166	TG 10:0_12:0_18:2	0.047988	0.16841	1.4247	1.8475
167	PE P-38:4 or PE O-38:5	0.048152	0.16841	1.0706	0.67988
168	FA 19:1	0.049053	0.17071	1.0444	0.75684
169	acylcarnitine 16:0	0.049325	0.17089	1.1564	0.87682

## Sheet: Table S2
Table S2. Summary for significantly altered lipids between different Parkinson's disease stages (Early, Mid, Advanced) as calculated by one -way ANOVA with their P-value
No.	Name	P-value
1	PC 31:1|PC 16:0_15:1	0.00022193
2	SM d37:1	0.00056649
3	SM d38:1.1	0.00147
4	PC 18:0_22:4	0.0015537
5	HexCer 34:1;2O	0.002016
6	FA 20:1 (eicosenoic acid)	0.0020688
7	SM d36:1	0.0021012
8	SM d36:0.1	0.0021187
9	TG 18:0_18:0_18:1	0.0021514
10	PE 40:5	0.002357
11	SM d38:0	0.0024089
12	FA 19:0	0.0024215
13	SM 26:3;2O/14:1	0.0026977
14	PC 40:4	0.0028005
15	PE 34:1	0.0028232
16	LPC P-18:0 or LPC O-18:1	0.0035199
17	LPE 22:5	0.0036075
18	TG 16:0_18:0_18:0	0.003695
19	PE 16:0_16::1	0.0037993
20	PE 36:6e	0.0042816
21	TG 52:1|TG 16:0_18:0_18:1	0.004352
22	FA 20:0 (arachidic acid)	0.0044837
23	SM 20:0;2O/18:2	0.0052526
24	PC P-44:5 or PC O-44:6	0.0057029
25	TG 48:1	0.005863
26	SM d39:2	0.0059699
27	TG 48:4 Isomer B	0.0060647
28	PC 38:4 Isomer B	0.0061394
29	LPC O-20:0	0.0061706
30	FA 22:2 (docosadienoic acid)	0.0063229
31	8,15-DiHETE	0.0066148
32	PC O-40:3 or PC 40:3e	0.0067325
33	SM d40:3	0.007135
34	Behenic acid	0.0071494
35	TG 14:0_16:0_17:1	0.0072785
36	LNAPE 18:1/N-20:0	0.0075742
37	PE 36:1	0.0075809
38	TG 49:0	0.0076583
39	PE 38:4	0.0080151
40	TG 51:1	0.0083476
41	GlcCer d38:1	0.0083511
42	SM 27:3;2O_16:0	0.0085982
43	PC 40:5	0.0088448
44	GalCer 18:1_24:1	0.0089349
45	LPC O-24:1	0.0089456
46	PC O-42:3 or PC 42:3e	0.0089507
47	PC O-42:2 or PC 42:2e	0.0093392
48	LPC 20:2	0.0094385
49	PC O-44:8 or PC 44:8e	0.010315
50	PC O-46:8	0.010483
51	LPE 22:4	0.010625
52	TG 54:5|TG 16:0_18:1_20:4	0.010765
53	Lactosylceramide d18:1/24:1 15Z	0.010789
54	PC 34:4	0.011366
55	SM d38:2	0.011461
56	LPC O-18:1	0.011596
57	PE 36:2	0.011928
58	PE 36:4	0.012252
59	TG 46:4 Isomer B	0.012709
60	PE 38:4 Isomer B	0.013417
61	TG 50:1	0.013449
62	PC 40:4e	0.013508
63	LNAPE 16:1/N-20:4	0.014206
64	PC P-42:5 or PC O-42:6 Isomer B	0.014537
65	LPC O-18:0	0.014754
66	PC 46:7e	0.015525
67	LPC 20:1.1	0.01557
68	TG 48:2	0.015584
69	FA 23:0	0.015862
70	PC 36:1	0.016061
71	PE O-17:1_18:2	0.016257
72	FA 19:1	0.016336
73	PC P-40:1 or PC O-40:2	0.016417
74	TG 54:5 Isomer B	0.016697
75	SM d41:5	0.016937
76	PC 40:7|PC 20:3_20:4	0.016969
77	12-HETE	0.017268
78	TG 15:0_16:0_18:0	0.017284
79	PC 17:0-22:4-d5	0.01731
80	TG 47:0|TG 15:0_16:0_16:0	0.017311
81	TG 49:2	0.01764
82	PE O-16:1_18:1	0.017754
83	PC O-18:0_16:0	0.018802
84	PC 40:7 Isomer A	0.019125
85	TG 46:1	0.01932
86	SM 43:2;2O	0.019491
87	PC 36:6e	0.019682
88	TG 51:2|TG 16:0_17:1_18:1	0.020679
89	PC O-44:7	0.020682
90	LPC 42:3	0.020798
91	Cer-NS d36:2	0.021039
92	PE P-36:4 or PE O-36:5	0.021436
93	PC 36:1e	0.021481
94	FA 20:2	0.021731
95	PE P-38:4 or PE O-38:5	0.02187
96	1-Stearoyl-2-oleoyl-sn-glycero-3-phosphocholine	0.022362
97	Cer d34:1	0.022386
98	GlcCer d42:2	0.022689
99	SM d35:1	0.02375
100	4-Hydroxy-5E,7Z,10Z,13Z,16Z,19Z-docosahexaenoic acid	0.024111
101	TG 53:0;2O|TG 18:0_18:0_17:0;2O	0.024341
102	PE O-18:1_20:4	0.024475
103	SM d43:2	0.024639
104	TG 54:1	0.024861
105	PC 42:6	0.024981
106	TG 46:0	0.025222
107	PE 16:0_18:1	0.026237
108	TG 51:1|TG 16:0_17:0_18:1	0.026689
109	TG 52:0	0.027491
110	PC P-40:5 or PC O-40:6	0.028199
111	SM 42:3;2O|SM 18:2;2O/24:1	0.028455
112	LNAPE 20:3/N-20:0	0.0289
113	PC 42:5e	0.029116
114	SM 24:1	0.029461
115	PI 40:4	0.029768
116	FAHFA 18:2/18:1	0.030563
117	PC 40:5 Isomer B	0.03074
118	PC 42:4	0.030803
119	HexCer 40:1;2O	0.031182
120	PE 35:2|PE 17:0_18:2	0.031331
121	HexCer 41:2;2O	0.031959
122	PC O-42:7 or PC 42:7e	0.032131
123	TG 48:0	0.03216
124	PC O-44:6	0.032211
125	LPC O-22:1	0.033304
126	TG 58:2	0.034209
127	TG 54:2|TG 18:0_18:1_18:1	0.034864
128	GlcCer d40:1	0.035127
129	PE 38:2e	0.036168
130	SM 35:1;2O	0.038037
131	PE 38:4 Isomer A	0.039325
132	PC 16:0_20:5	0.039812
133	PE O-17:1_20:4	0.041012
134	13-KODE	0.041044
135	PC 38:3	0.041437
136	SM (d18:1/18:1(9Z))	0.041495
137	PC 36:5 Isomer D	0.042728
138	DG 38:5	0.042849
139	PI 36:4|PI 16:0_20:4	0.042865
140	TG 18:1_18:1_20:1	0.043079
141	PC 38:6|PC 18:2_20:4	0.043307
142	LPC 22:5.1	0.044711
143	Phosphatidylethanolamine alkenyl 16:0-20:4	0.045955
144	FAHFA 38:6	0.046015
145	2-OAHSA	0.046209
146	LPC 40:4	0.046259
147	PE 36:0|PE 18:0_18:0	0.046416
148	C16 Lactosyl Ceramide (d18:1/16:0)	0.046539
149	PE O-20:1_18:2	0.047307
150	GlcCer d41:1	0.047917
151	Phosphatidylethanolamine 16:1-18:1	0.048637
152	DG 18:1_18:1	0.049006
153	FA 17:0	0.049138
154	SM d38:1	0.049518
155	SM 25:2;2O/18:0	0.04962
